# Supplementary material for: GSK2334470 attenuates high salt-exacerbated rheumatoid arthritis progression by restoring Th17/Treg homeostasis
Source: PubMed Central journal article supplement (PMC11214488; doi:10.1016/j.isci.2024.109798), 2024-04-26
Supplement: mmc1.pdf [file mmc1.pdf]

**Supplemental information**

**GSK2334470 attenuates high salt-exacerbated  
rheumatoid arthritis progression  
by restoring Th17/Treg homeostasis**

**Qian Mo, Mansoor Bolideei, Shan-Jie Rong, Jia-Hui Luo, Chun-Liang Yang, Wan-Ying Lu, Qi-Jie Chen, Jia-Wei Zhao, Fa-Xi Wang, Ting Wang, Yang Li, Xi Luo, Shu Zhang, Fei Xiong, Qi-Lin Yu, Zi-Yun Zhang, Shi-Wei Liu, Fei Sun, Ling-Li Dong, and Cong-Yi Wang**

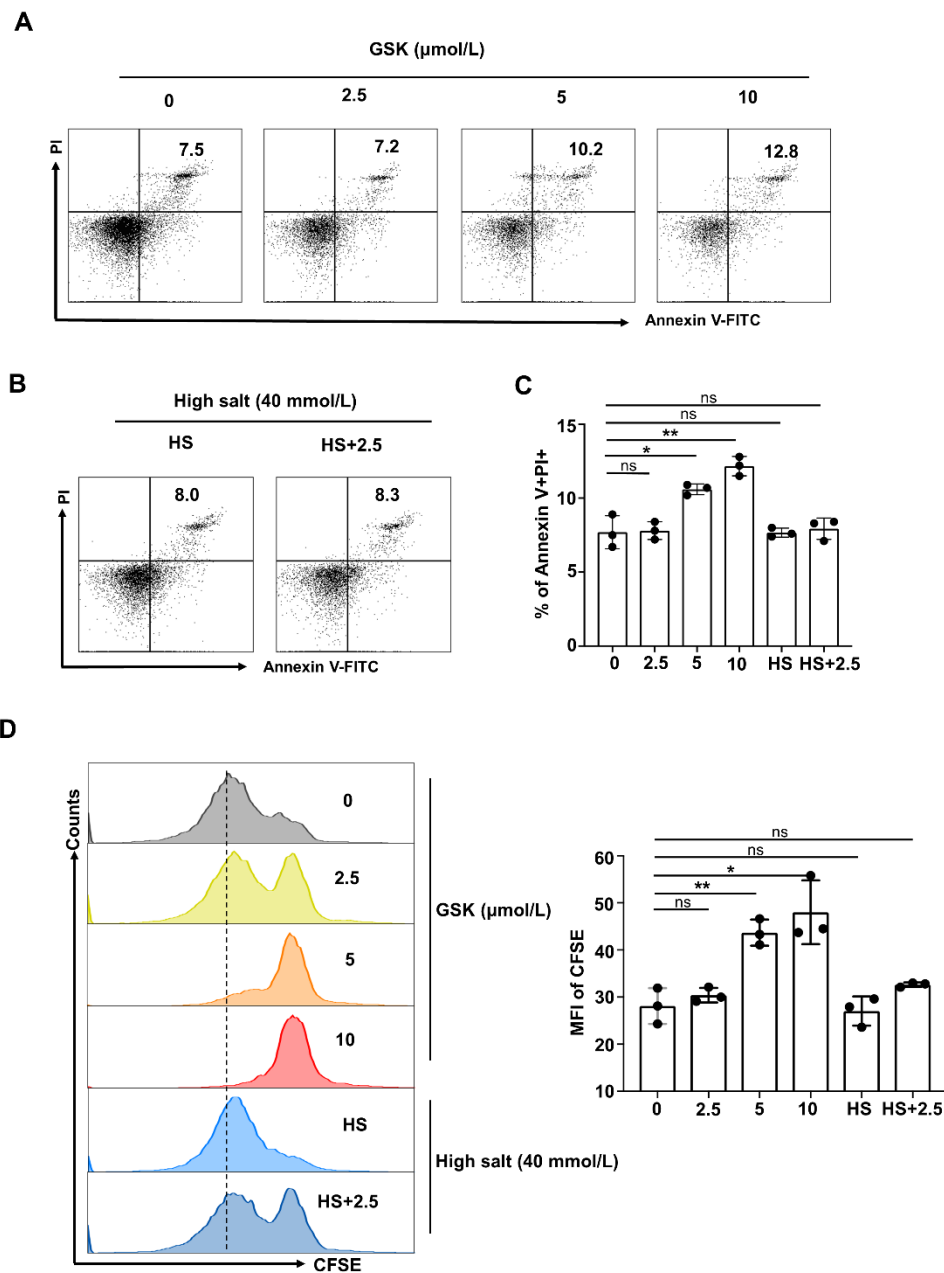

**Figure S1. [The impact of GSK and HS on CD4 T cell proliferation and apoptosis], Related to Figure 2. (A, B, C)** The effects of HS and varying concentrations of GSK on CD4 T cell apoptosis. No significant alteration in cell apoptosis was observed when GSK was applied at a concentration of 2.5  $\mu\text{mol/L}$  ( $n = 3$ ). **(D)** The effects of HS and varying concentrations of GSK on CD4 T cell proliferation. A slight alteration in cell proliferation was observed at a concentration of 2.5  $\mu\text{mol/L}$  ( $n = 3$ ). Statistical significance was calculated by unpaired Student's  $t$  test and data are represented as mean  $\pm$  SD. \* $p < 0.05$ , \*\* $p < 0.01$ , ns (not significant).

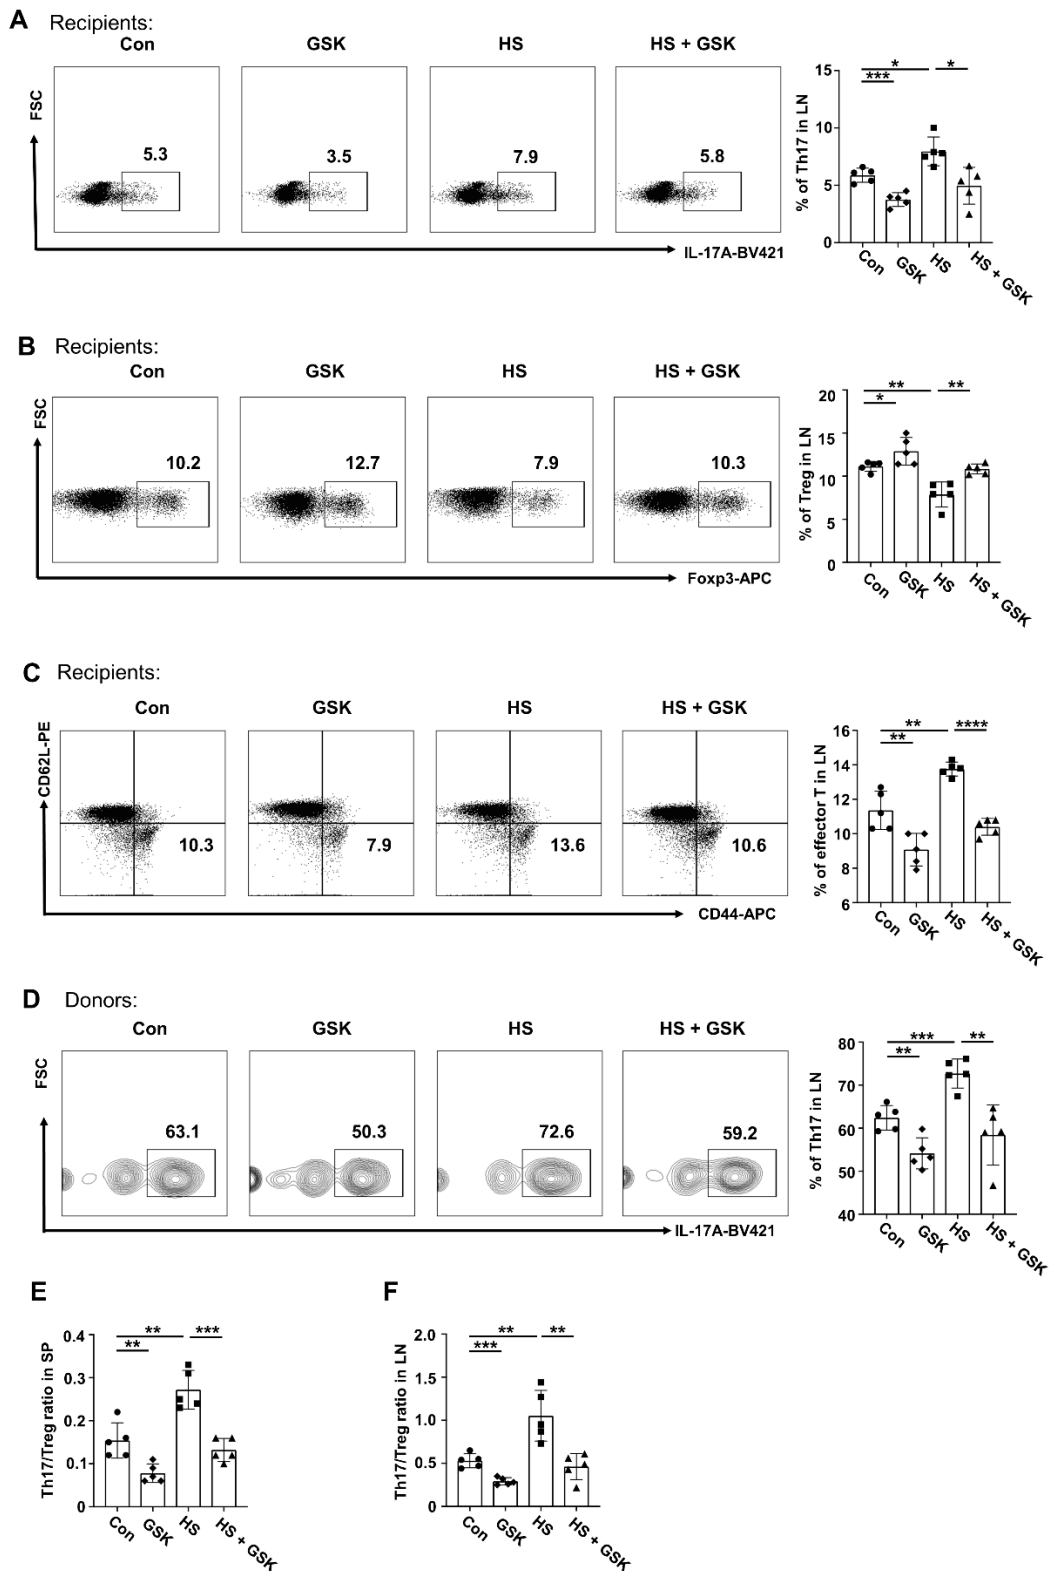

**Figure S2. [Subpopulation analysis of CD4 T cells in lymph nodes of the adoptive transfer model], Related to Figure 3. (A)** The proportion of Th17 cells within lymph node CD4 T cells of recipient mice (n = 5). **(B)** The proportion of Treg cells within lymph node CD4 T cells of recipient mice (n = 5). **(C)** The proportion of activated CD4 T cells within lymph node CD4 T cells of recipient mice (n = 5). **(D)** The proportion of IL-17A

producing donor cells in lymph nodes (n = 5). **(E)** The ratio of Th17/Treg cells within recipient-derived CD4 T cells in spleen. **(F)** The ratio of Th17/Treg cells within recipient-derived CD4 T cells in lymph nodes. Statistical significance was calculated by unpaired Student's *t*-test data are represented as mean  $\pm$  SD. \* $p < 0.05$ , \*\* $p < 0.01$ , \*\*\* $p < 0.001$ , \*\*\*\* $p < 0.0001$ .

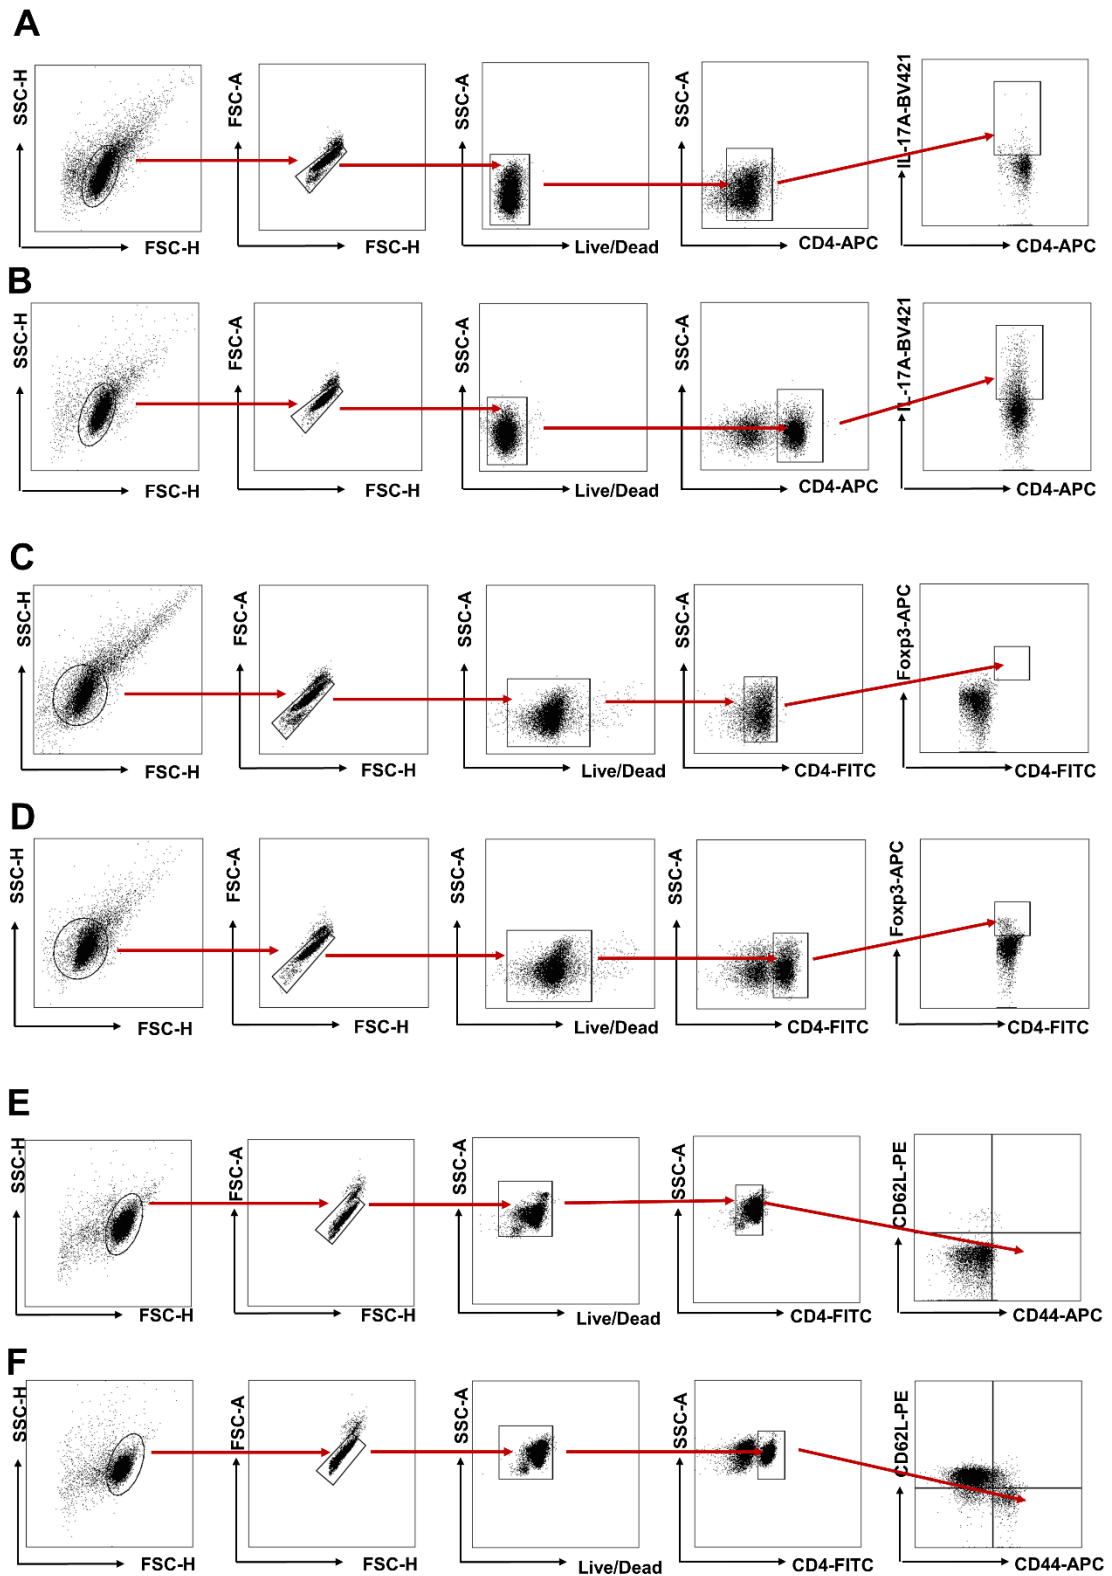

**Figure S3. [Gating strategies for flow cytometry in CIA model], Related to Figure 5. (A).** Gating strategy for Th17 cells. **(B)** Lymphocytes were initially gated, followed by the selection of live single cells and further gating on CD4 T cells. Within the CD4 T cell population, cells positive for IL-17A were gated to identify Th17 cells. **(C)** Gating

strategy for Treg cells. **(E)** Gating strategy for activated CD4 T cells. **(D, F)**. Similarly, Foxp3<sup>+</sup> Treg cells and CD44<sup>+</sup> CD62L<sup>-</sup> activated CD4 T cells were gated.

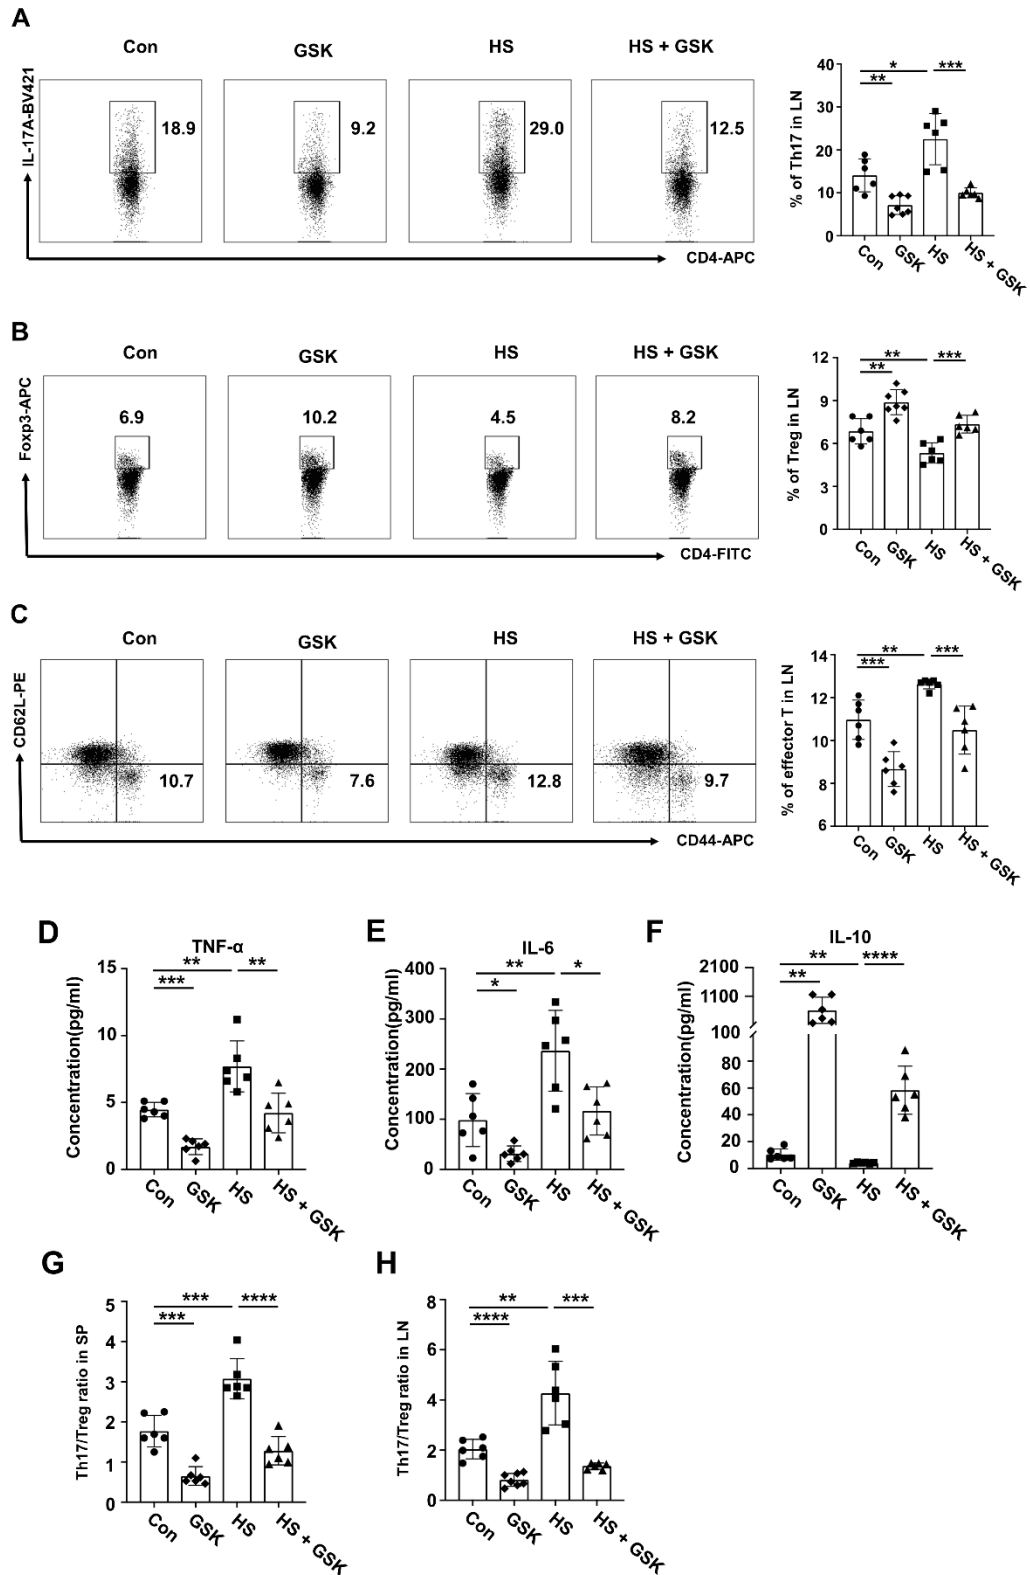

**Figure S4. [Subpopulation analysis of CD4 T cells in lymph nodes and cytokine levels in the serum of CIA mice], Related to Figure 5. (A)** The proportion of Th17 cells within lymph node CD4 T cells of CIA mice (n = 6). **(B)** The proportion of Treg cells within lymph node CD4 T cells of CIA mice (n = 6). **(C)** The proportion of activated CD4 T cells within lymph node CD4 T cells of CIA mice (n = 6). **(D)** The serum level of

TNF- $\alpha$  in CIA mice (n = 6). **(E)** The serum level of IL-6 in CIA mice (n = 6). **(F)** The serum level of IL-10 in CIA mice (n = 6). **(G, H)** The ratio of Th17/Treg cells in the spleen and lymph nodes of CIA mice. Statistical significance was calculated by unpaired Student's *t*-test data are represented as mean  $\pm$  SD. \**p*<0.05, \*\**p*<0.01, \*\*\**p*<0.001, \*\*\*\**p*<0.0001.

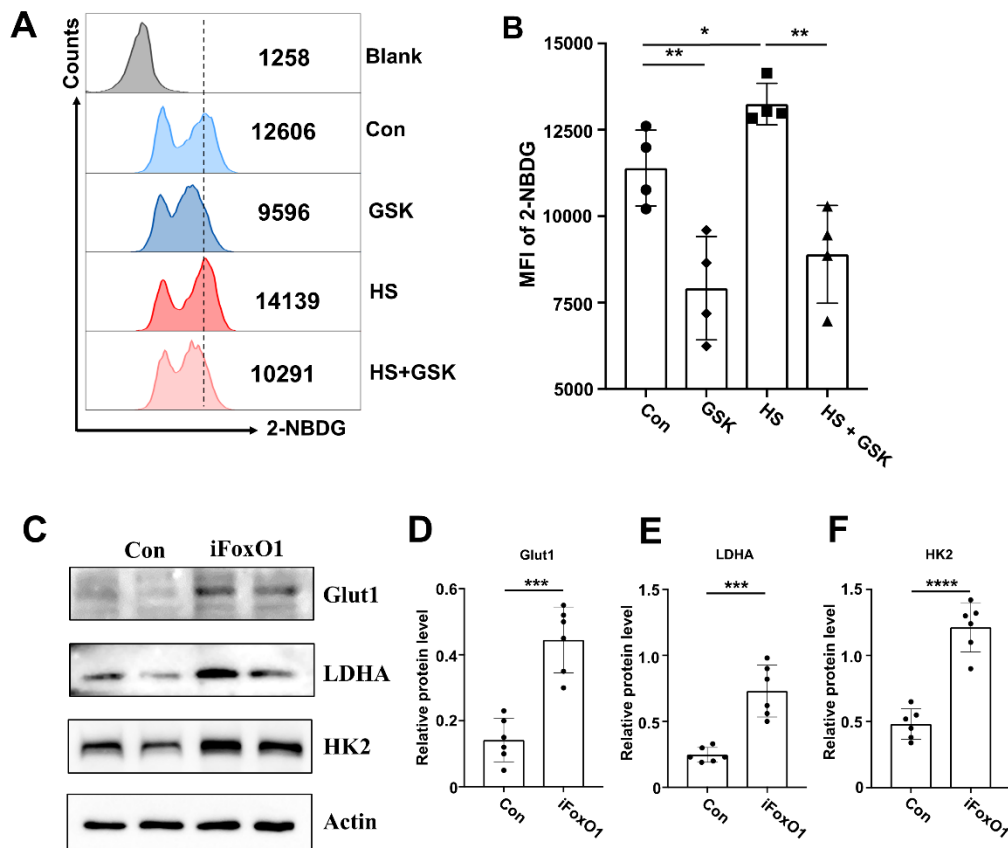

**Figure S5. [Effects of GSK, 2-DG and iFoxO1 on glucose metabolism and Th17/Treg polarization], Related to Figure 6. (A, B)** Glucose uptake indicated by the 2-NBDG signal intensity in CD4 T cells upon HS and/or GSK treatment (n = 3). **(C-F)** Western blot analysis of Glut1, LDHA, and HK2 in CD4 T cells upon iFoxO1 treatment. **(G, H)** Proportion of in vitro differentiated Th17 cells upon treatment with vehicle control (Con), 2-DG and iFoxO1 (n = 3). **(I, J)** Proportion of in vitro differentiated Treg cells upon treatment with vehicle control (Con), 2-DG and iFoxO1 (n = 3). Statistical significance was calculated by unpaired Student's *t*-test data are represented as mean  $\pm$  SD. \**p*<0.05, \*\**p*<0.01, \*\*\**p*<0.001, \*\*\*\**p*<0.0001.
